# Supplementary material for: Implementation of Advanced Methods for Reproductive Pharmacovigilance in Autism: A Meta-Analysis of the Effects of Prenatal Antidepressant Exposure
Source: Atypon-hosted journal article supplement (doi:10.1176/appi.ajp.2020.18070766), 2020-05-07

**Supplemental Table S1 – Results of Meta-Analyses of Autism Risk following Antidepressant Exposure during Second & Third Trimester**

| AD Class                                               | Comparator Subgroup |               |   |      |       |             |               |   |      |       |                    |          |   |   |   | Heterogeneity between Comparator Subgroup Analyses |    |      |
|--------------------------------------------------------|---------------------|---------------|---|------|-------|-------------|---------------|---|------|-------|--------------------|----------|---|---|---|----------------------------------------------------|----|------|
|                                                        | Population          |               |   |      |       | Psychiatric |               |   |      |       | Discordant Sibling |          |   |   |   |                                                    |    |      |
|                                                        | OR / HR             | [95% CI]      | N | Z    | P     | OR / HR     | [95% CI]      | N | Z    | P     | OR / HR            | [95% CI] | N | Z | P | Q                                                  | df | P    |
| <b>ANTIDEPRESSANT EXPOSURE DURING SECOND TRIMESTER</b> |                     |               |   |      |       |             |               |   |      |       |                    |          |   |   |   |                                                    |    |      |
| <b>Hazard Ratio</b>                                    |                     |               |   |      |       |             |               |   |      |       |                    |          |   |   |   |                                                    |    |      |
| Any                                                    | 1.74                | [1.31 – 2.31] | 4 | 3.84 | <.001 | 1.94        | [1.20 – 3.14] | 1 | 2.69 | .007  |                    |          |   |   |   | 0.14                                               | 1  | .708 |
| SSRI                                                   | 1.87                | [1.27 – 2.76] | 3 | 3.14 | .002  |             |               |   |      |       |                    |          |   |   |   |                                                    |    |      |
| <b>Odds Ratio</b>                                      |                     |               |   |      |       |             |               |   |      |       |                    |          |   |   |   |                                                    |    |      |
| Any                                                    | 1.71                | [1.49 – 1.96] | 8 | 7.70 | <.001 | 1.89        | [1.49 – 2.38] | 2 | 5.29 | <.001 |                    |          |   |   |   | 0.49                                               | 2  | .480 |
| SSRI                                                   | 1.88                | [1.50 – 2.36] | 6 | 5.46 | <.001 | 1.12        | [0.40 – 3.12] | 1 | 0.22 | .829  |                    |          |   |   |   | 0.94                                               | 1  | .332 |
| <b>ANTIDEPRESSANT EXPOSURE DURING THIRD TRIMESTER</b>  |                     |               |   |      |       |             |               |   |      |       |                    |          |   |   |   |                                                    |    |      |
| <b>Hazard Ratio</b>                                    |                     |               |   |      |       |             |               |   |      |       |                    |          |   |   |   |                                                    |    |      |
| Any                                                    | 1.74                | [1.31 – 2.31] | 4 | 3.84 | <.001 | 1.94        | [1.20 – 3.14] | 1 | 2.69 | .007  |                    |          |   |   |   | 0.14                                               | 1  | .708 |
| SSRI                                                   | 1.87                | [1.27 – 2.76] | 3 | 3.14 | .002  |             |               |   |      |       |                    |          |   |   |   |                                                    |    |      |
| <b>Odds Ratio</b>                                      |                     |               |   |      |       |             |               |   |      |       |                    |          |   |   |   |                                                    |    |      |
| Any                                                    | 1.69                | [1.36 – 2.10] | 8 | 4.77 | <.001 | 1.87        | [1.30 – 2.70] | 2 | 3.36 | .001  |                    |          |   |   |   | 0.21                                               | 1  | .644 |
| SSRI                                                   | 1.81                | [1.27 – 2.59] | 6 | 3.27 | .001  | 1.43        | [0.46 – 4.47] | 1 | 0.62 | .539  |                    |          |   |   |   | 0.15                                               | 1  | .699 |

**Supplemental Table S2 – Results of Meta-Regression with Incremental Inclusion of Candidate Moderators: Population-Based Studies of Prenatal Exposure to Any Antidepressant**

| Moderator                      | Current Model |       | Test of Model |           |          | Model Goodness of Fit |           |          | Change from Prior Row |       | Test of Change |           |          |
|--------------------------------|---------------|-------|---------------|-----------|----------|-----------------------|-----------|----------|-----------------------|-------|----------------|-----------|----------|
|                                | $\tau^2$      | $R^2$ | <i>Q</i>      | <i>df</i> | <i>p</i> | <i>Q</i>              | <i>df</i> | <i>p</i> | $\tau^2$              | $R^2$ | <i>Q</i>       | <i>df</i> | <i>p</i> |
| Intercept                      | .0028         | 0.00  |               |           |          |                       |           |          |                       |       |                |           |          |
| Ethnicity Control <sup>1</sup> | .0000         | 1.00  | 5.97          | 1         | .0145    | 2.52                  | 5         | .7742    | -.0028                | 1.00  | 5.97           | 1         | .0145    |
| Study Design <sup>2</sup>      | .0000         | 1.00  | 6.80          | 2         | .0333    | 1.68                  | 4         | .7935    | .0000                 | 0.00  | 0.83           | 1         | .3620    |
| Study Location <sup>3</sup>    | .0000         | 1.00  | 6.80          | 3         | .0785    | 1.68                  | 3         | .6405    | .0000                 | 0.00  | 0.00           | 1         | .9853    |
| Publication Year               | .0000         | 1.00  | 7.38          | 4         | .1173    | 1.11                  | 2         | .5741    | .0000                 | 0.00  | 0.57           | 1         | .4486    |

1. Ethnicity Control - No Significant Difference vs. Significant Difference in Maternal Ethnicity between Study Groups. 2. Study Design: Cohort vs. Case-Control. 3. Study Location - North America vs. Europe.

## Supplemental Figure S1 – Search Strategy

(((Asperger) OR autism) OR autism spectrum disorder) OR autistic)  
AND  
((((((((((((((((antidepressant) OR SSRI) OR SNRI) OR tricyclic) OR citalopram) OR escitalopram) OR fluoxetine)  
OR fluvoxamine) OR paroxetine) OR sertraline) OR desvenlafaxine) OR duloxetine) OR venlafaxine) OR  
bupropion) OR mirtazapine) OR amitriptyline) OR nortriptyline) OR imipramine) OR desipramine) OR  
clomipramine)  
AND  
(((antenatal) OR fetal) OR pregnancy) or prenatal)

**Supplemental Figure S2 – Flow Diagram of Study Inclusions and Exclusions**

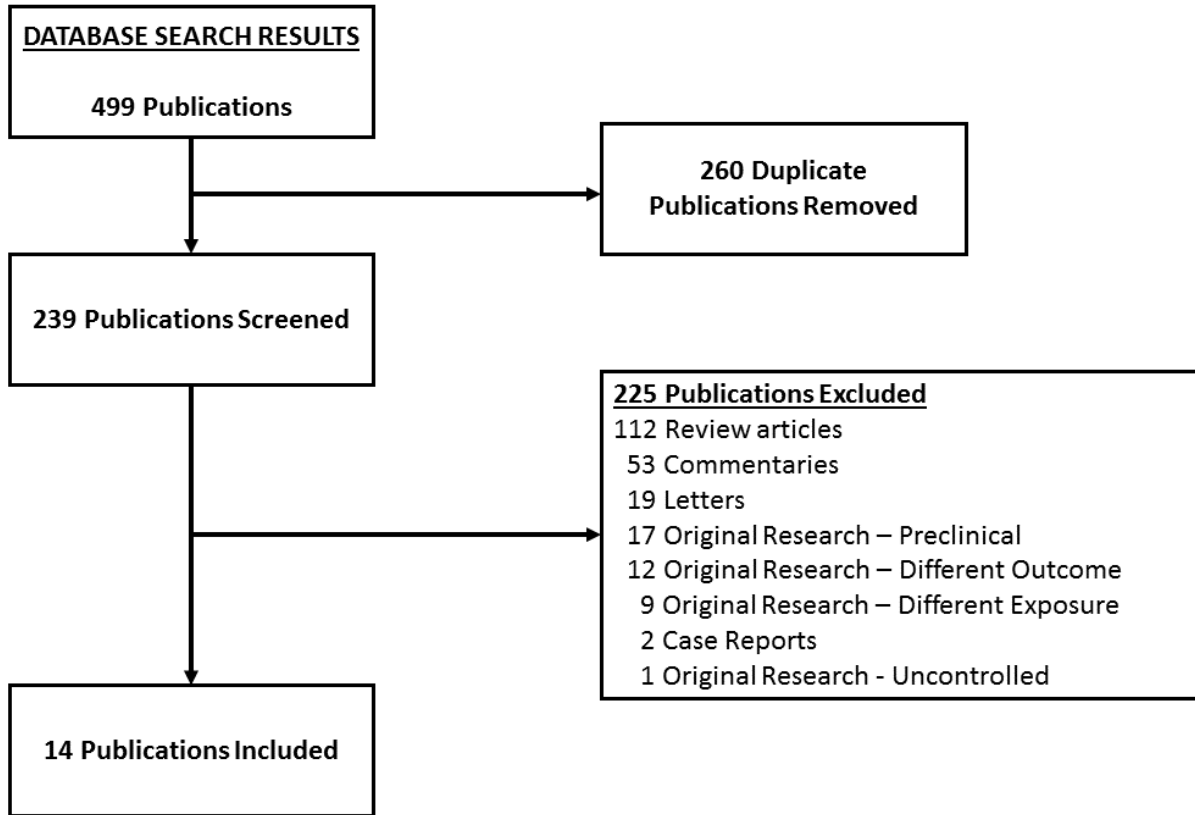

## Supplemental Figure S3 - Forest Plots of Autism Risk following Antidepressant Exposure during First Trimester Stratified by Comparison Group Definition

### A. Hazard Ratios

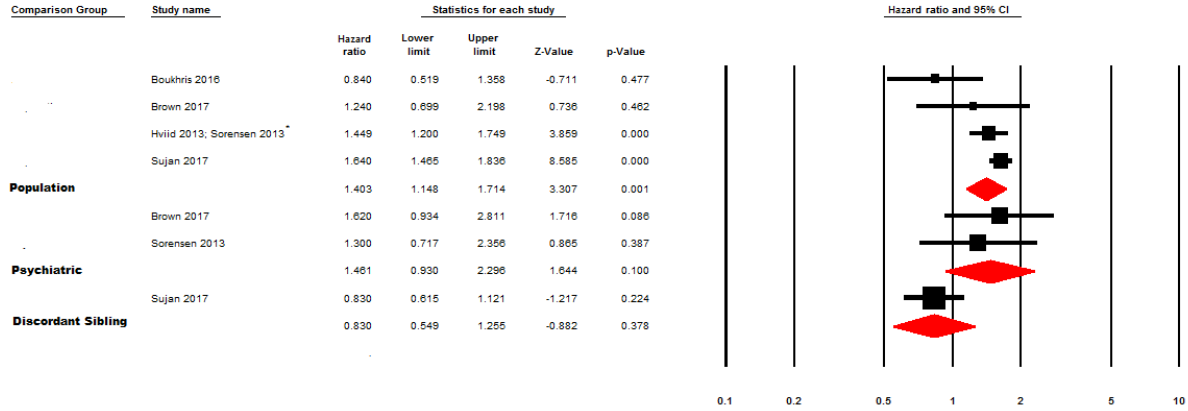

No Autism Risk Autism Risk

### B. Odds Ratios

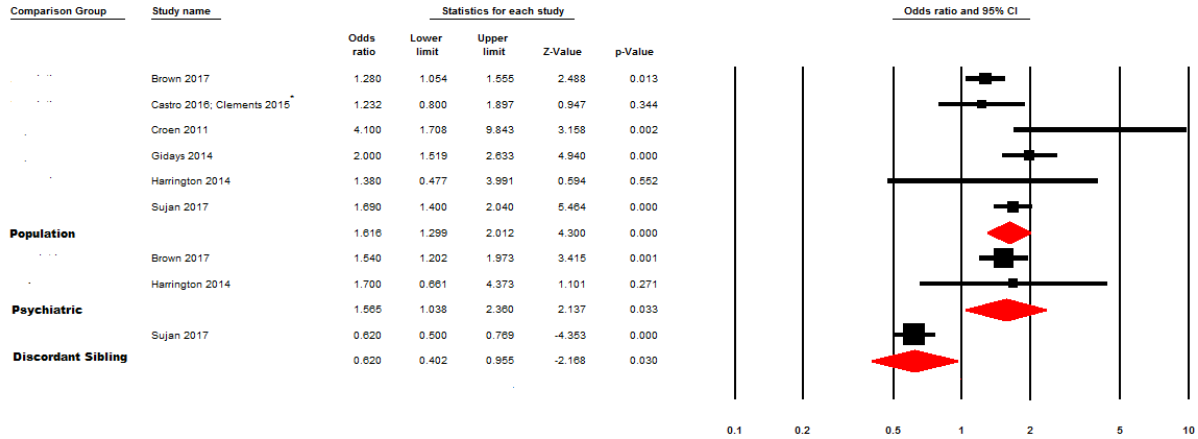

No Autism Risk Autism Risk

\*A single pooled estimate was calculated for studies from the same data source.

## Supplemental Figure S4 - Forest Plots of Autism Risk following SSRI Exposure during First Trimester Stratified by Comparison Group Definition

### A. Hazard Ratios

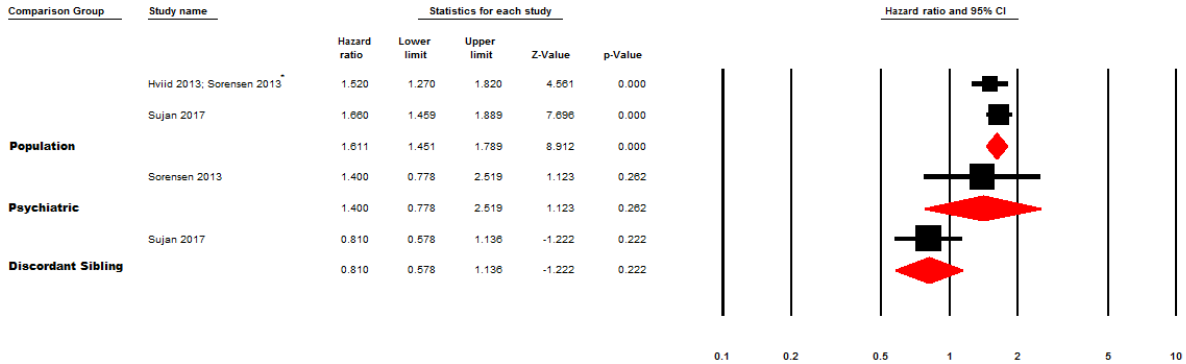

No Autism Risk Autism Risk

### B. Odds Ratios

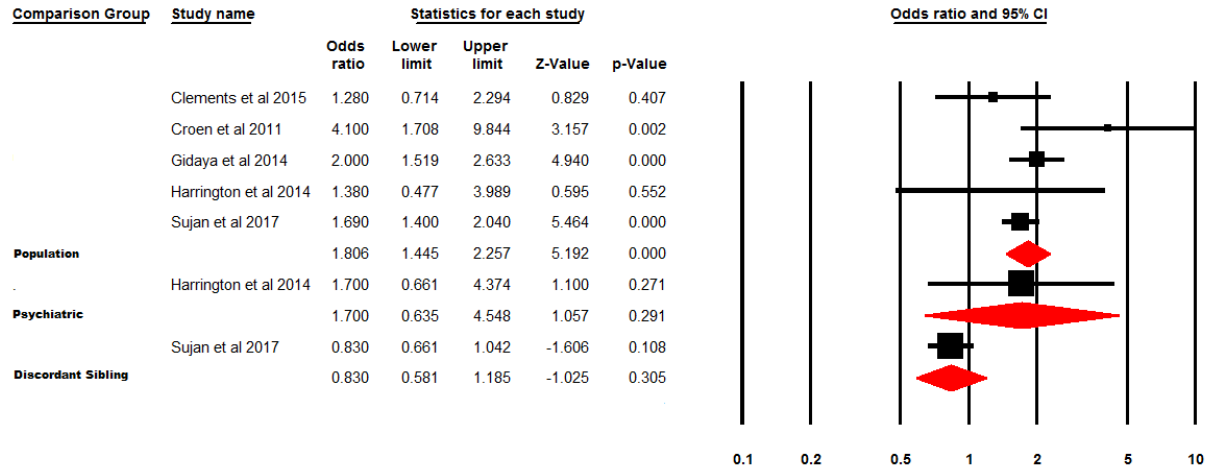

No Autism Risk Autism Risk

\*A single pooled estimate was calculated for studies from the same data source.

### Supplemental Figure S5 – Funnel Plot of Publications Reporting Association of Autism with Prenatal Exposure to Any Antidepressant

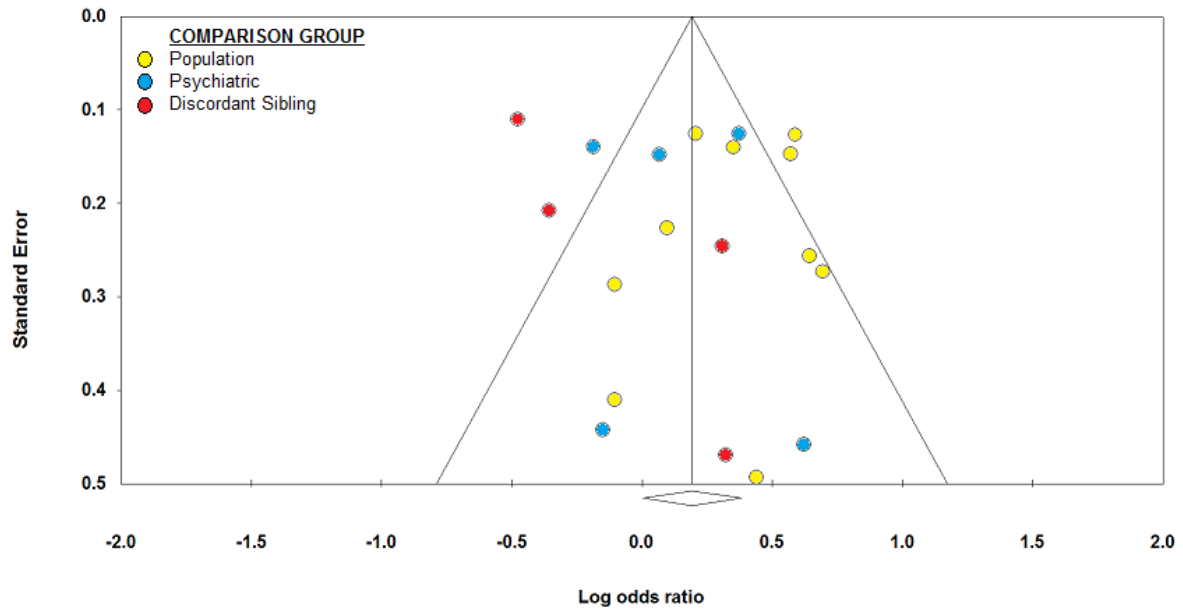

**Supplemental Figure S6 – Funnel Plot of Publications Reporting Association of Autism with Prenatal SSRI Exposure**

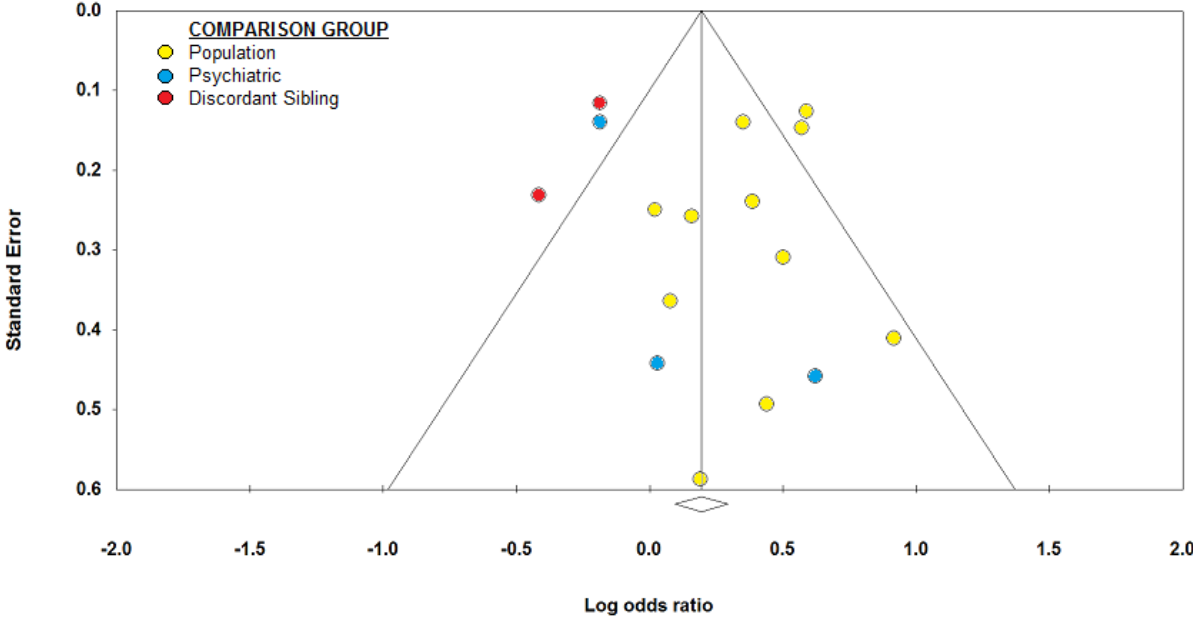

Supplement: appi.ajp.2020.18070766.ds001.pdf [file appi.ajp.2020.18070766.ds001.pdf]
